# Supplementary material for: Graphene covalently functionalized with 2,6-diaminoanthraquinone (DQ) as a high performance electrode material for supercapacitors
Source: Royal Society of Chemistry journal article supplement (doi:10.1039/d0nj03358h), 2020-01-01
Supplement: d0nj03358h1.pdf [file d0nj03358h1.pdf]

**Graphene covalently functionalized with 2,6-diaminoquinone (DQ) as high performance electrode material for supercapacitors**

Yuying Yang\*, Weixia Ma, Hong Zhu, Haixia Meng, Chengjuan Wang, Fuquan Ma, Zhongai Hu\*

Key Laboratory of Eco-Environment-Related Polymer Materials of Ministry of Education, Key Laboratory of Polymer Materials of Gansu Province, College of Chemistry and Chemical Engineering, Northwest Normal University, Lanzhou, Gansu 730070, PR China

\* Corresponding author. Tel.: +86 931 7970806 fax: +86 931 7971989

*Email address:* [490230698@qq.com](mailto:490230698@qq.com)

**Calculations of energy density and power density based on the galvanostatic charge-discharge curves<sup>1</sup>:**

In two-electrode system, Formula (1) and (2) were employed to calculate the energy density

( $E$ , Wh kg<sup>-1</sup>) and power density ( $P$ , W kg<sup>-1</sup>)

$$E = \frac{0.5C(\Delta V)^2}{3.6} \quad (1)$$

$$p = \frac{E}{t} \quad (2)$$

where  $C$  ( $F g^{-1}$ ) represents the specific capacitance of a two electrode device,  $t$  (s) is discharging time and  $\Delta V$  (V) refers to voltage window.

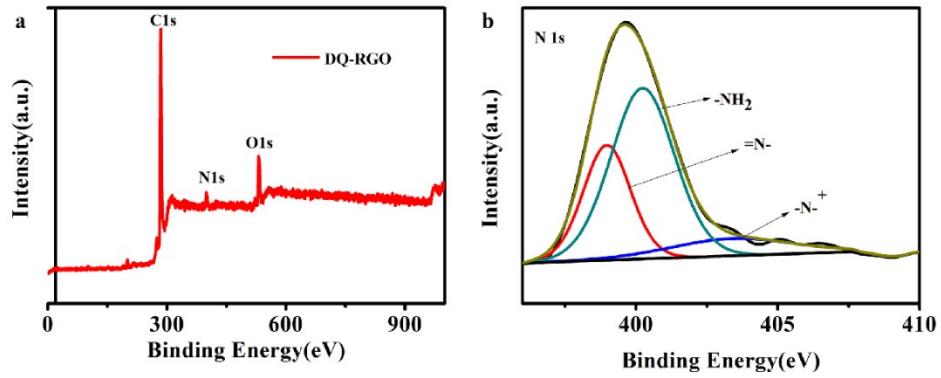

Fig. S1. XPS of the survey scan (a) and (b) N 1s

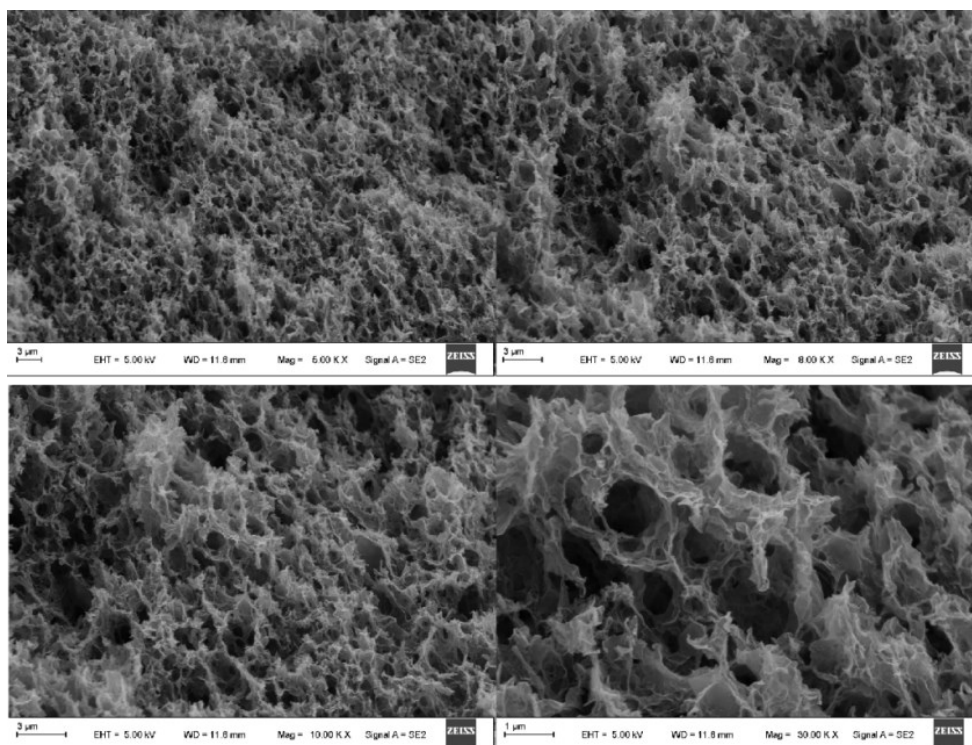

Fig. S2. SEM of RGO

Table S1 Performance comparison of different electrode material

| Electrode material | Electrolyte                     | $E_{max}$<br>(Wh kg <sup>-1</sup> ) | $P_{max}$<br>(kW kg <sup>-1</sup> ) | Cycle numbers | Capacitance retention (%) | Ref |
|--------------------|---------------------------------|-------------------------------------|-------------------------------------|---------------|---------------------------|-----|
| HQSA-rGO/CF        | H <sub>2</sub> SO <sub>4</sub>  | 6.25                                | 0.522                               | -             | -                         | 2   |
| RGO-PPy            | KCL                             | 2.5                                 | 38.6                                | 5000          | 83                        | 3   |
| SGN//AC            | PVA-KOH                         | 7.15                                | 0.02                                | 1000          | 75                        | 4   |
| rHGO-PPD           | H <sub>2</sub> SO <sub>4</sub>  | 11.71                               | 0.249                               | 5000          | 73.6                      | 5   |
| DBU-FG-2           | KOH                             | 5.5                                 | 0.05                                | -             | -                         | 6   |
| PGO@PANI//AC       | KOH                             | 7.91                                | 7.826                               | 1500          | 77                        | 7   |
| Ferrocene/G        | Na <sub>2</sub> SO <sub>4</sub> | 6.19                                | 26                                  | 8000          | 70                        | 8   |
| m-rGOHG80/rGO      | H <sub>2</sub> SO <sub>4</sub>  | 7.88                                | 0.125                               | 10000         | 95.5                      | 9   |

|               |                                |      |       |      |      |           |
|---------------|--------------------------------|------|-------|------|------|-----------|
| GMP-1.0       | -                              | 6.8  | 3.263 | 3000 | 86.7 | 10        |
| DQ-RGO//Th-GH | H <sub>2</sub> SO <sub>4</sub> | 14.2 | 0.763 | 8000 | 80   | This work |

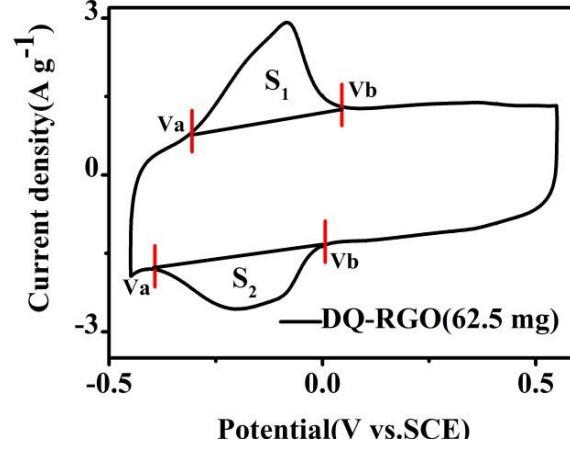

Fig. S3. CV curves of DQ-RGO (62.5 mg) at a scan rate of 5 mV s<sup>-1</sup>

The calculation formula for the mass of DQ [18]:

$$Q = \int I dt = \int_{V_b}^{V_a} \frac{I}{\frac{dV}{dt}} dV = \frac{1}{v} \int_{V_b}^{V_a} I dV \quad (3)$$

$$m_A = n_A \cdot M_A = \frac{\Delta Q}{ZF} M_A \quad (4)$$

where  $Q$  (C),  $I$  (A),  $t$  (s),  $V$  (V),  $m_A$  (g),  $n_A$  (mol),  $M_A$  (mol g<sup>-1</sup>),  $F$  and  $z$  are voltammetric charge, instantaneous anodic (cathodic) current at a given potential range, sampling time, potential range, material mass taking part in redox reaction, amount of substance of active materials, molar mass of active materials, Faraday constant and stoichiometric coefficient of electron transport in electrochemical processes while  $V_a$  and  $V_b$  (V) are the selected boundary of potential range, respectively.  $\Delta Q$  (C) is defined as a charge contributed by cathodic or anodic reaction of DQ, which is numerically equal to the integral area of the region ( $S_1$  or  $S_2$ ).

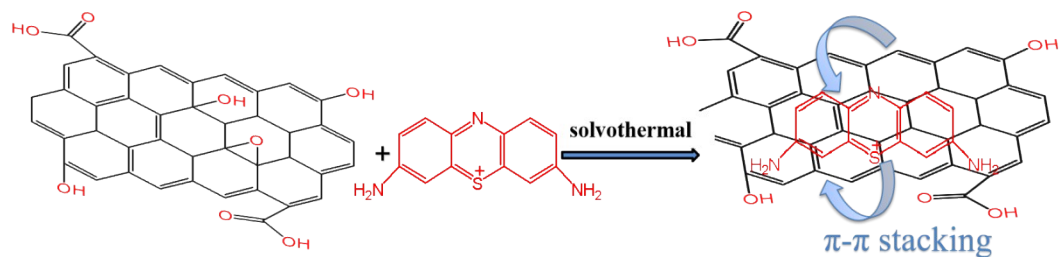

Fig. S4. Schematic illustration for the synthesis of Th-GH.

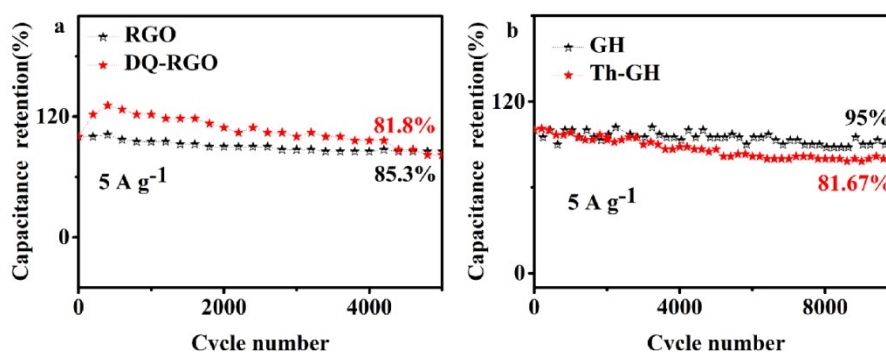

Fig. S5. (a) The cycling stability of RGO and DQ-RGO; (b) The cycling stability of GH and Th-GH

## References

1. L. Hou, Z. Hu, X. Wang, L. Qiang, Y. Zhou, L. Lv and S. Li, *J Colloid Interface Sci*, 2018, **540**, 88-96.
2. M. Khalida, A. Hassana, A. M. B. Honoratob, F. N. Crespilhoa, H. Varelaa, *J. Electroanal. Chem.*, 2019, **847**, 113193.
3. M. Jana, P. Khanra, N. C. Murmu, P. Samanta, J. H. Lee and T. Kuila, *Chem. Phys.*, 2014, **16**, 7618-7626.
4. H. W. Gao, C. Hao, Y. Qi, J. Li, X. H. Wang, S. S. Zhou, *J. Alloys Compd.*, 2018, **767**, 1048-1056.
5. P. C. Du, Y. M. Dong, H. X. Kang, Q. Wang, J. Y. Niu, *Electrochim. Acta*, 2019, **320**, 134610.
6. X. Zhang, N. Qu, Q. Y. Fan and H. Yang, *Mater. Res. Express*, 2019, **6**, 085606.
7. H. Bigdeli, M. Moradi, S. Borhani, E. A. Jafari, S. Hajati, M. A. Kiani, *Physic E.*, 2018, **100**, 45-53.
8. A. Borenstein, V. Strauss, M. D. Kowal, M. Yoonessi, M. Muni, M. Anderson, R. B. Kaner, *J. Mater. Chem. A*, 2018, **6**, 20463-20472.

9. C. X. Liu, G. Y. Han, Y. Z. Chang, Y. M. Xiao, H. H. Zhou, G. Q. Shi, *Chem. Eng. J.*, 2017, **328**, 25-34.

10. D. Li, Y. R. Liu, B. P. Lin, C. W. Lai, Y. Sun, H. Yang and X. Q. Zhang, *RSC Adv.*, 2015, **5**, 98278-98287.
